# Supplementary material
Source: PubMed Central journal article supplement (PMC7027951)
Supplement: NIHMS1549474-supplement-Supplemental_Publication_Material_1.pdf [file NIHMS1549474-supplement-Supplemental_Publication_Material_1.pdf]

## SUPPLEMENTAL MATERIAL

### Supplemental Figure and Figure Legend

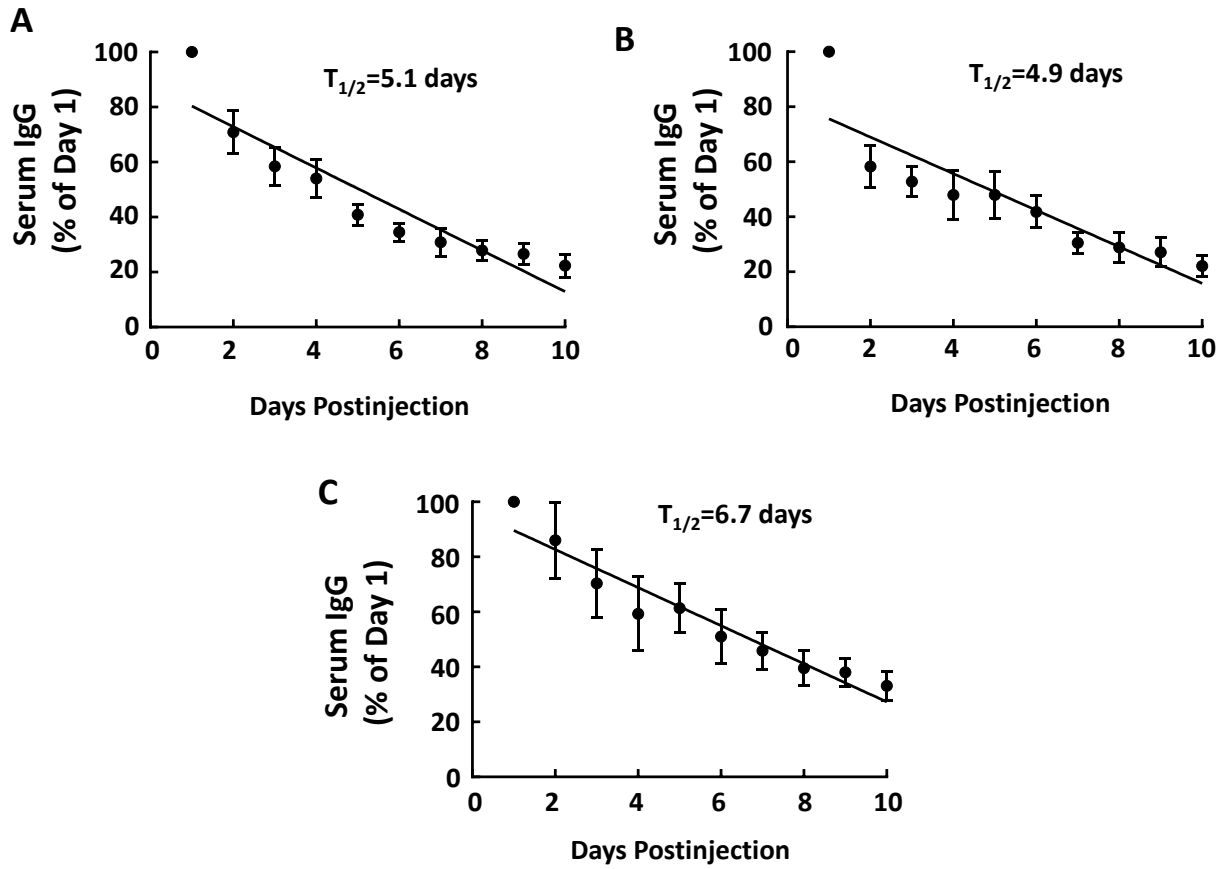

**Suppl. Figure 1:** Circulating serum levels of control IgG, HFD IgG and control IgG treated with neuraminidase (NA) decline in a similar manner after administration to B cell-deficient mice. Mice were injected with 150ug of control IgG (A), HFD IgG (B), and NA-treated control IgG (C), and serum levels were monitored daily beginning one day postinjection for 10 days. Values are mean $\pm$ SEM, n=3 per group.
